# Supplementary material
Source: PubMed Central journal article supplement (PMC2657404)
Supplement: 0812516106_0812516106SI.pdf [file 0812516106_0812516106SI.pdf]

# Supporting Information

Erat et al. 10.1073/pnas.0812516106

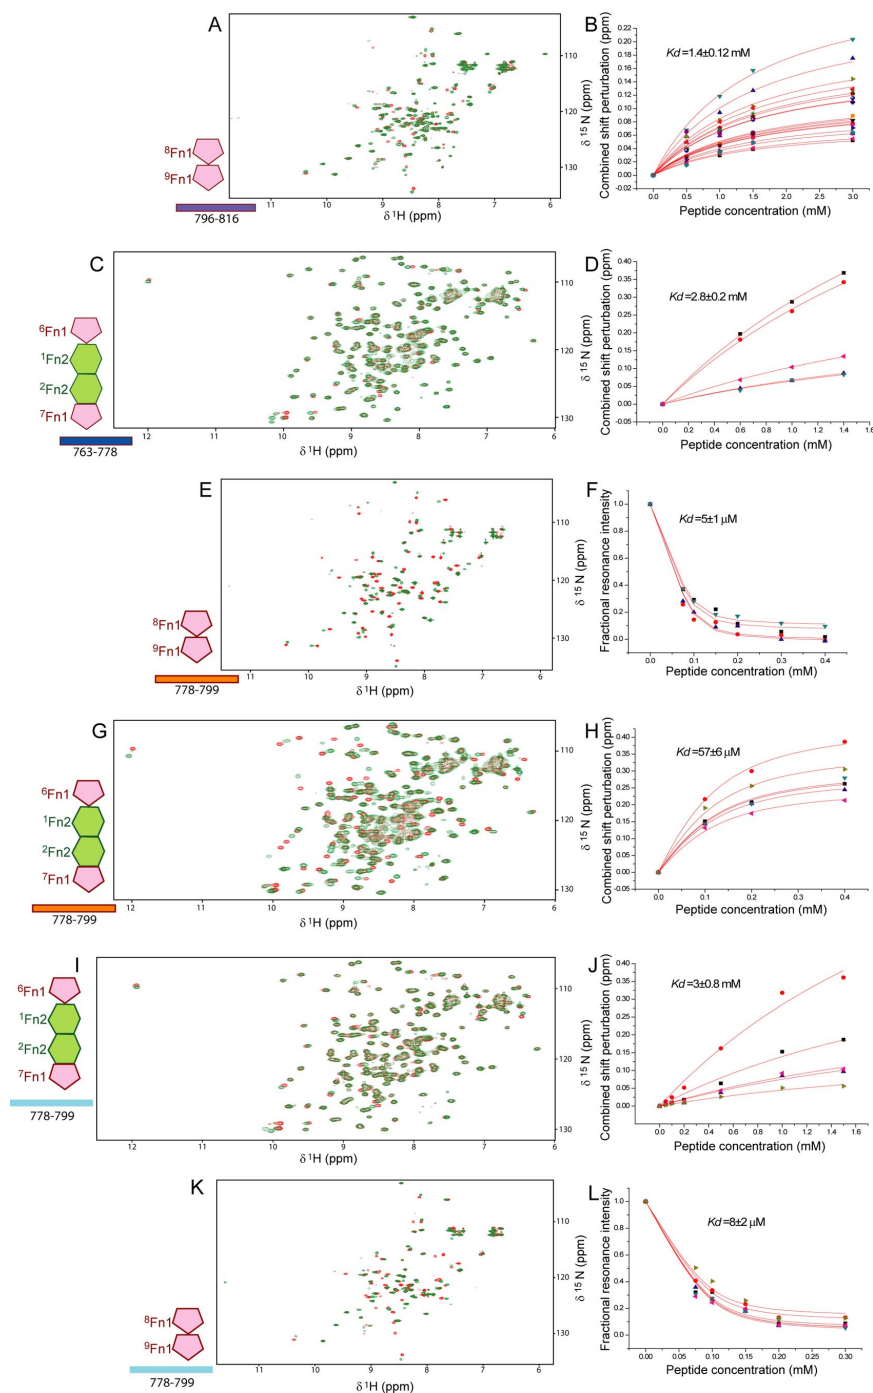

**Fig. S1.** NMR titrations of collagen peptides to fibronectin fragments. (A, C, E, G, I, and K)  $^{15}\text{N}$ -HSQC spectra of the indicated fibronectin fragment at 0.1 mM concentration in PBS, 25 °C ( $^8$ - $^9\text{Fn1}$ ) or 20 mM NaPi (pH 7.2), 37 °C ( $^6\text{Fn1}^1$ - $^2\text{Fn1}^7\text{Fn1}$ ). Free-protein spectra are shown in red, and spectra in excess of collagen peptide are shown in green. The different peptides used are shown as colored bars (see Fig. 1 in the main manuscript) and the  $\alpha_1$ (I) (A-H) or  $\alpha_2$ (I) (I-L) residue span is provided. (B, D, H, F, J, and L) Plots of combined  $^1\text{H}$  and  $^{15}\text{N}$  chemical shift perturbations (B, D, H, J) or free resonance intensities (F and L) versus peptide concentration for the different NMR titrations. These data were fit to extract equilibrium dissociation parameters assuming a single binding event. The fits are shown as red lines.

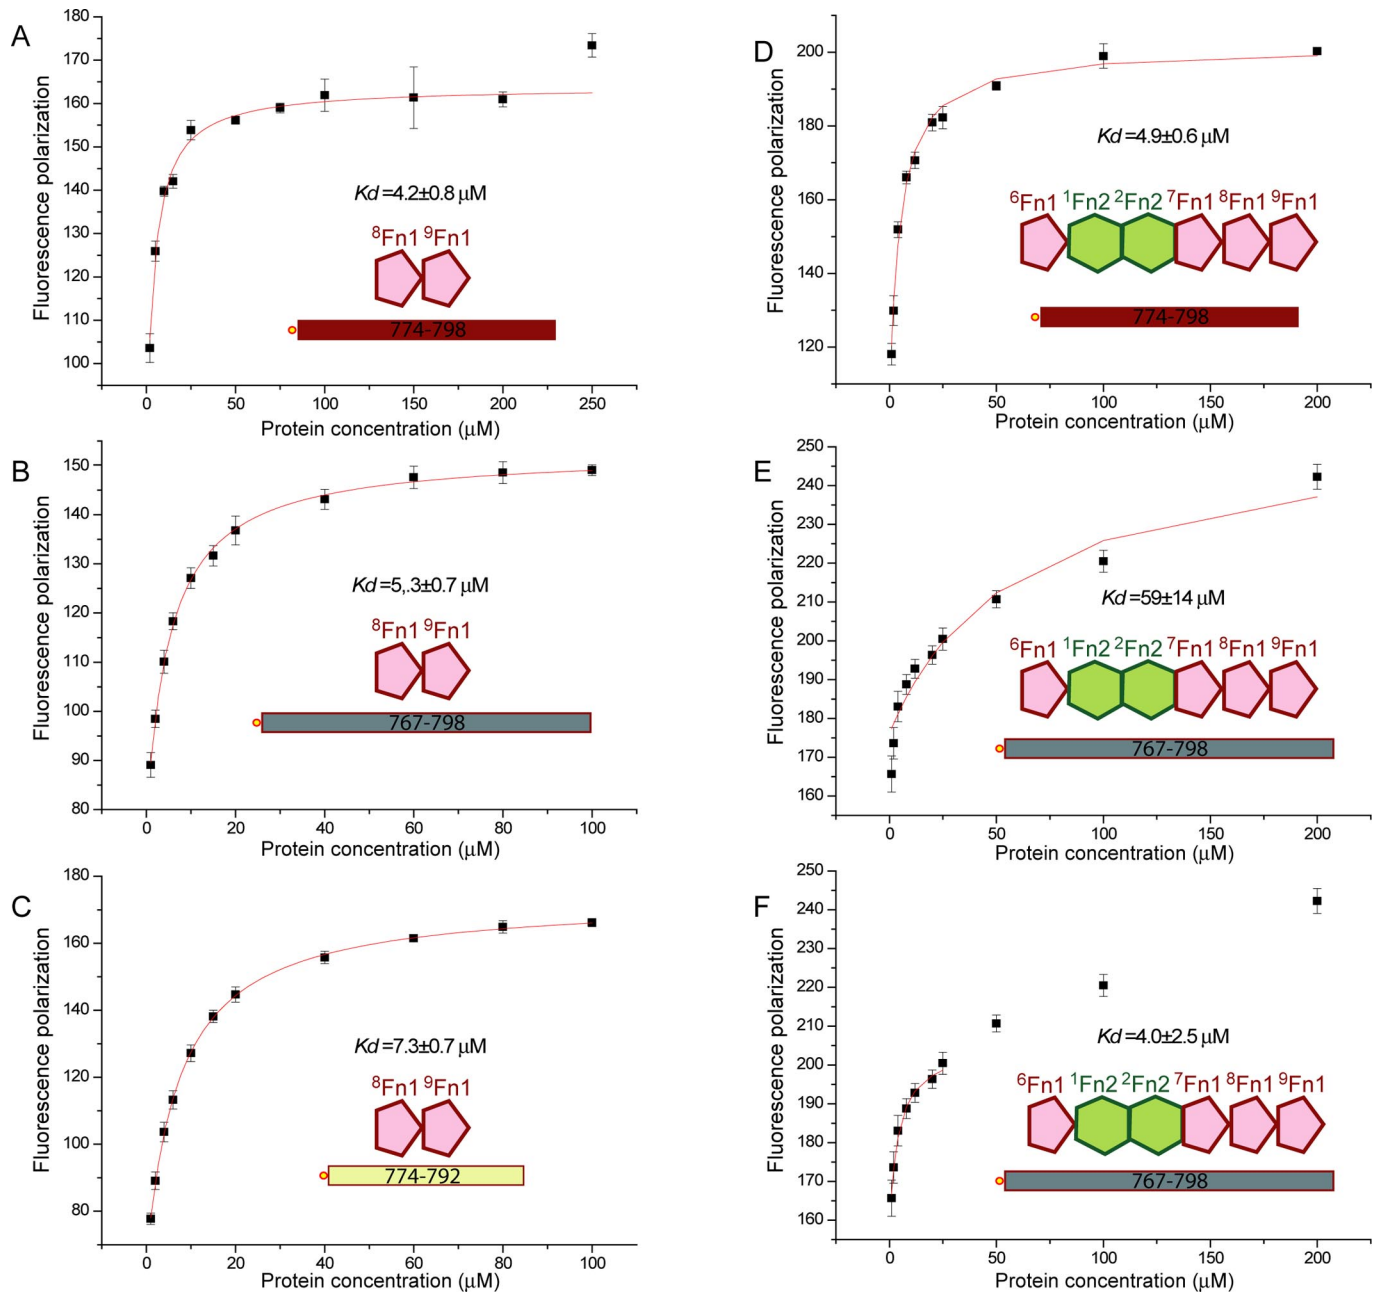

**Fig. S2.** Fluorescent anisotropy titrations of  $\alpha_1(I)$  collagen peptides and fibronectin fragments. Shown here is fluorescent polarization of 75 nM 5-carboxy-fluorescein-labeled peptides [colored bars and  $\alpha_1(I)$  residue span] in 150 mM NaCl, 20 mM Tris-Cl buffer (pH 7.4) (TBS), 25 °C versus concentration of the indicated fibronectin fragments. Error bars correspond to 1 standard deviation from 5 sequential anisotropy readouts. Data were fit assuming a single binding event to extract equilibrium parameters. (A, D)  $^8\text{Fn}1$  and GBD display the same affinity towards  $\alpha_1(I)$  peptide 774–798, indicating lack of cooperative peptide binding by the GBD sub-fragments.  $\alpha_1(I)$  peptide 767–798 (B, E and F) is N-terminally elongated compared with D, and displays evidence of two binding events with GBD. Fitting of the initial 7 points in that titration (F) yields a  $K_d$  value for the first binding event comparable to that of GBD with  $\alpha_1(I)$  peptide 774–798 (D). Titration of peptide 767–798 with  $^8$ – $^9\text{Fn}1$  (B) does not produce a similar pattern; thus, this effect may be caused by weaker  $^6\text{Fn}1$ – $^2\text{Fn}1$  interactions to the N-terminal extension. (C) Titrations with a C-terminally truncated peptide and  $^8$ – $^9\text{Fn}1$  show little effect on affinity.

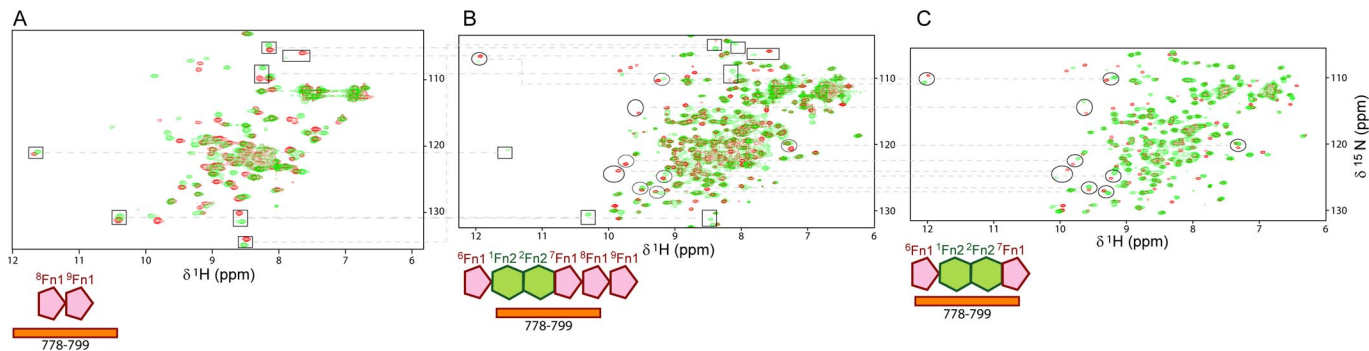

**Fig. S3.** Binding of  $\alpha_1(I)$  collagen peptide to GBD. Shown here are  $^{15}\text{N}$ -HSQC spectra of  $^{8-9}\text{FnI}$  (A), GBD (B), and  $^{6}\text{FnI}^{1-2}\text{FnII}^7\text{FnI}$  (C) in the absence (red) or the presence (green) of a 3-fold excess  $\alpha_1(I)$  peptide 778–799. The  $^{8-9}\text{FnI}$  and  $^{6}\text{FnI}^{1-2}\text{FnII}^7\text{FnI}$  spectra correspond to those in Fig. S1. GBD spectra were acquired in PBS at 37 °C with a  $2\times$  excess of peptide for the bound state. GBD resonances perturbed upon binding can be correlated to similar resonances in  $^{8-9}\text{FnI}$  and  $^{6}\text{FnI}^{1-2}\text{FnII}^7\text{FnI}$  as shown. Because of differences in the  $^{15}\text{N}$  sweep width, 2 resonances are differently aliased between the spectra and are connected by vertical lines. A number of  $^{8-9}\text{FnI}$  resonances are absent in the free GBD, likely because of chemical exchange, but appear at frequencies corresponding to the bound state in the presence of peptide.

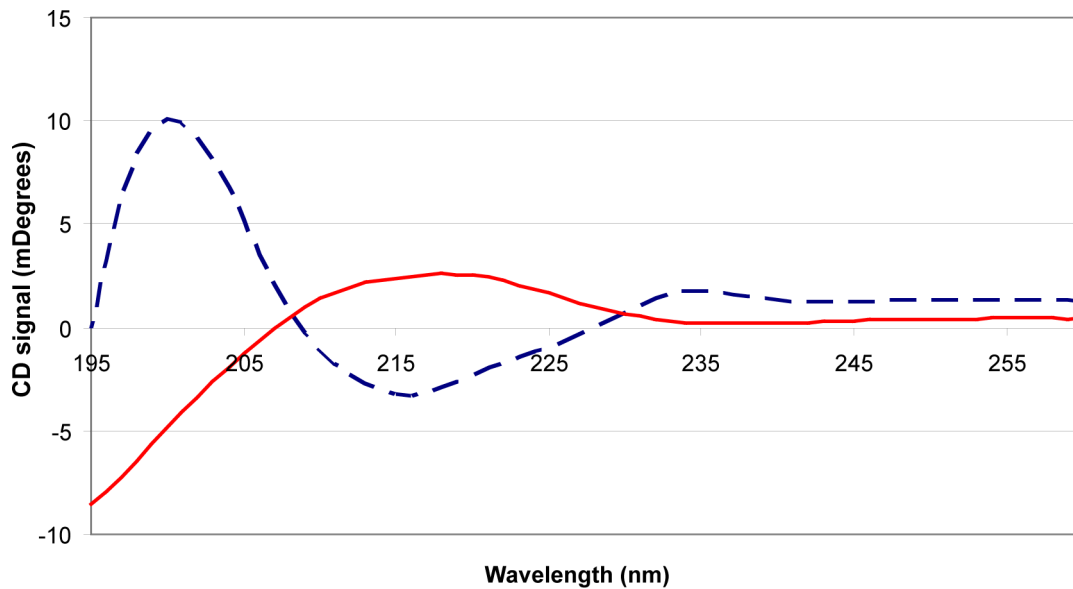

**Fig. S4.** Circular dichroism spectrum of isolated  $\alpha_1(I)$  G<sub>778</sub>–G<sub>799</sub> peptide. Shown here are far-UV circular dichroism spectra from a 50  $\mu$ M sample of  $\alpha_1(I)$  G<sub>778</sub>–G<sub>799</sub> (solid red line) and a 20  $\mu$ M sample of the all  $\beta$ -strand FN <sup>2</sup>F<sub>n</sub>III domain (dashed blue line) (1) in a 150 mM NaCl, 20 mM Na<sub>2</sub>HPO<sub>4</sub> (pH 7.2) buffer. The peptide spectrum is substantially different from that of the all- $\beta$  protein used as reference, having a positive maximum at 218 nm. Such maxima are typically associated with random coil compounds (2), however they are also consistent with polyproline II conformations depending on the amino acid sequence (3).

1. Vakonakis I, Staunton D, Rooney LM, Campbell ID (2007) Interdomain association in fibronectin: Insight into cryptic sites and fibrillogenesis. *EMBO J* 26:2575–2583.
2. Greenfield N, Fasman GD (1969) Computed circular dichroism spectra for the evaluation of protein conformation. *Biochemistry* 8:4108–4116.
3. Darnell G, Orgel JP, Pahl R, Meredith SC (2007) Flanking polyproline sequences inhibit beta-sheet structure in polyglutamine segments by inducing PPII-like helix structure. *J Mol Biol* 374:688–704.

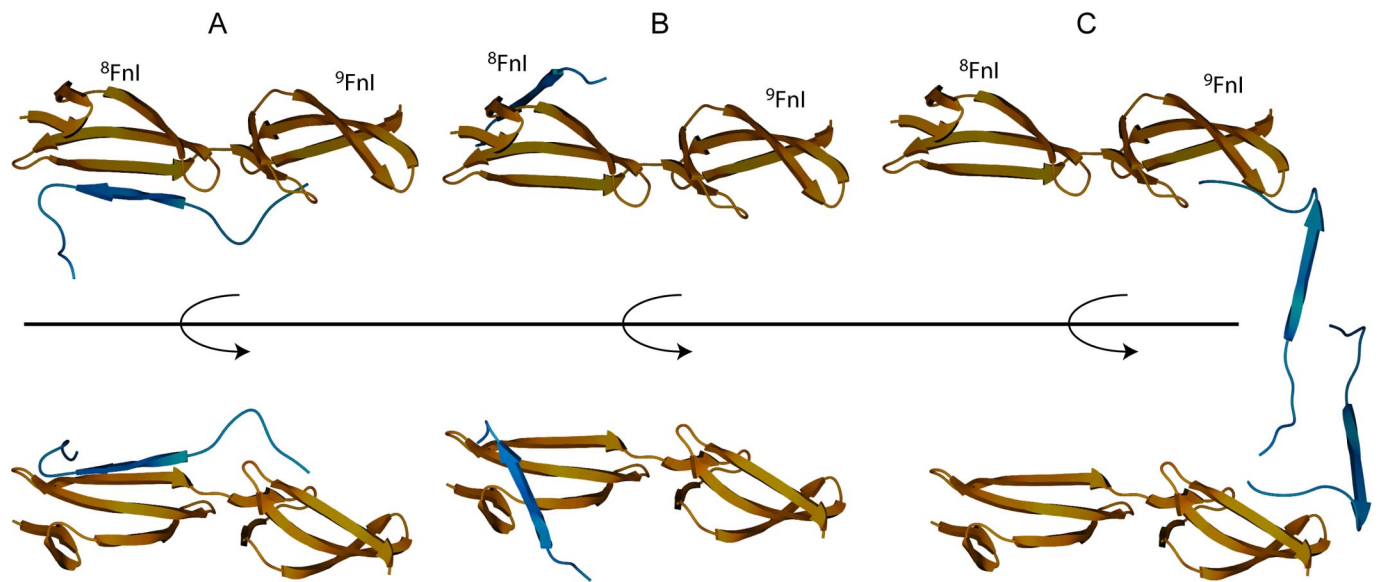

**Fig. S5.** The different protein–peptide interfaces present in the  $^{8-9}$ Fnl/ $\alpha_1(I)$  peptide crystal. The protein is shown in gold and the peptide in blue in 2 orientations. (A) The main antiparallel  $\beta$ -strand addition interface described (total area 725  $\text{\AA}^2$ ). (B) The peptide  $\beta$ -strand contacts  $^{8-9}$ Fnl strand C in perpendicular orientation, whereas the peptide C terminus contacts the  $^{8-9}$ Fnl B/C loop and strand D (total area 430  $\text{\AA}^2$ , 30% due to peptide C terminus). (C) The peptide C terminus contacts  $^9$ Fnl strand E in antiparallel orientation (total area 435  $\text{\AA}^2$ , 80% due to peptide C terminus).

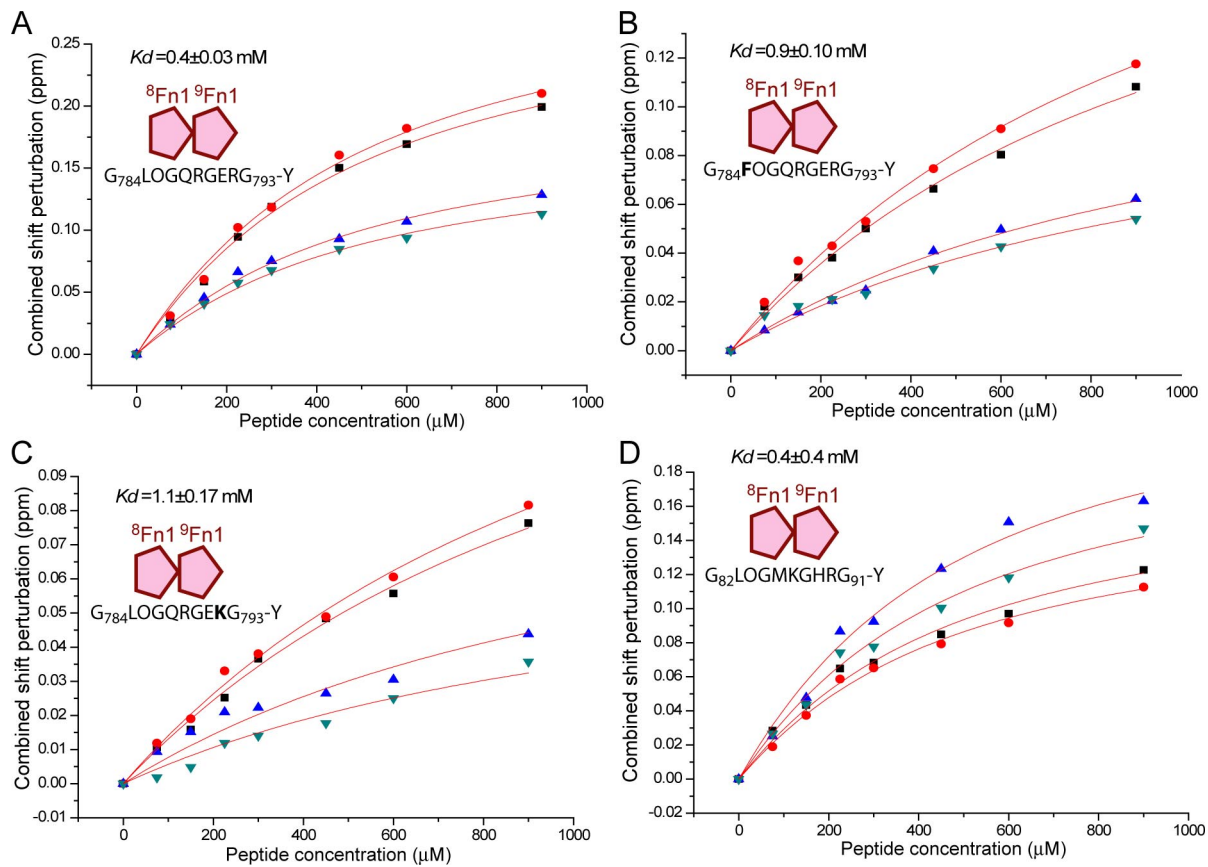

**Fig. S6.** NMR titrations of short  $\alpha_1(\text{I})$  peptides. Shown are plots of combined  ${}^1\text{H}$  and  ${}^{15}\text{N}$  chemical shift perturbations versus peptide concentration for NMR titrations of the wild-type core sequence (A), sequences bearing single amino acid substitutions (B and C), or a putative FN-binding sequence identified from analysis of the structure (D). Samples were  $150 \mu\text{M}$   ${}^{15}\text{N}$   ${}^8\text{-}{}^9\text{Fn1}$  in PBS buffer at  $37^\circ\text{C}$  and indicated peptide concentration. Even conservative substitutions, shown in bold, on positions 2 (B) or 9 (C) cause significant changes in the observed affinities.

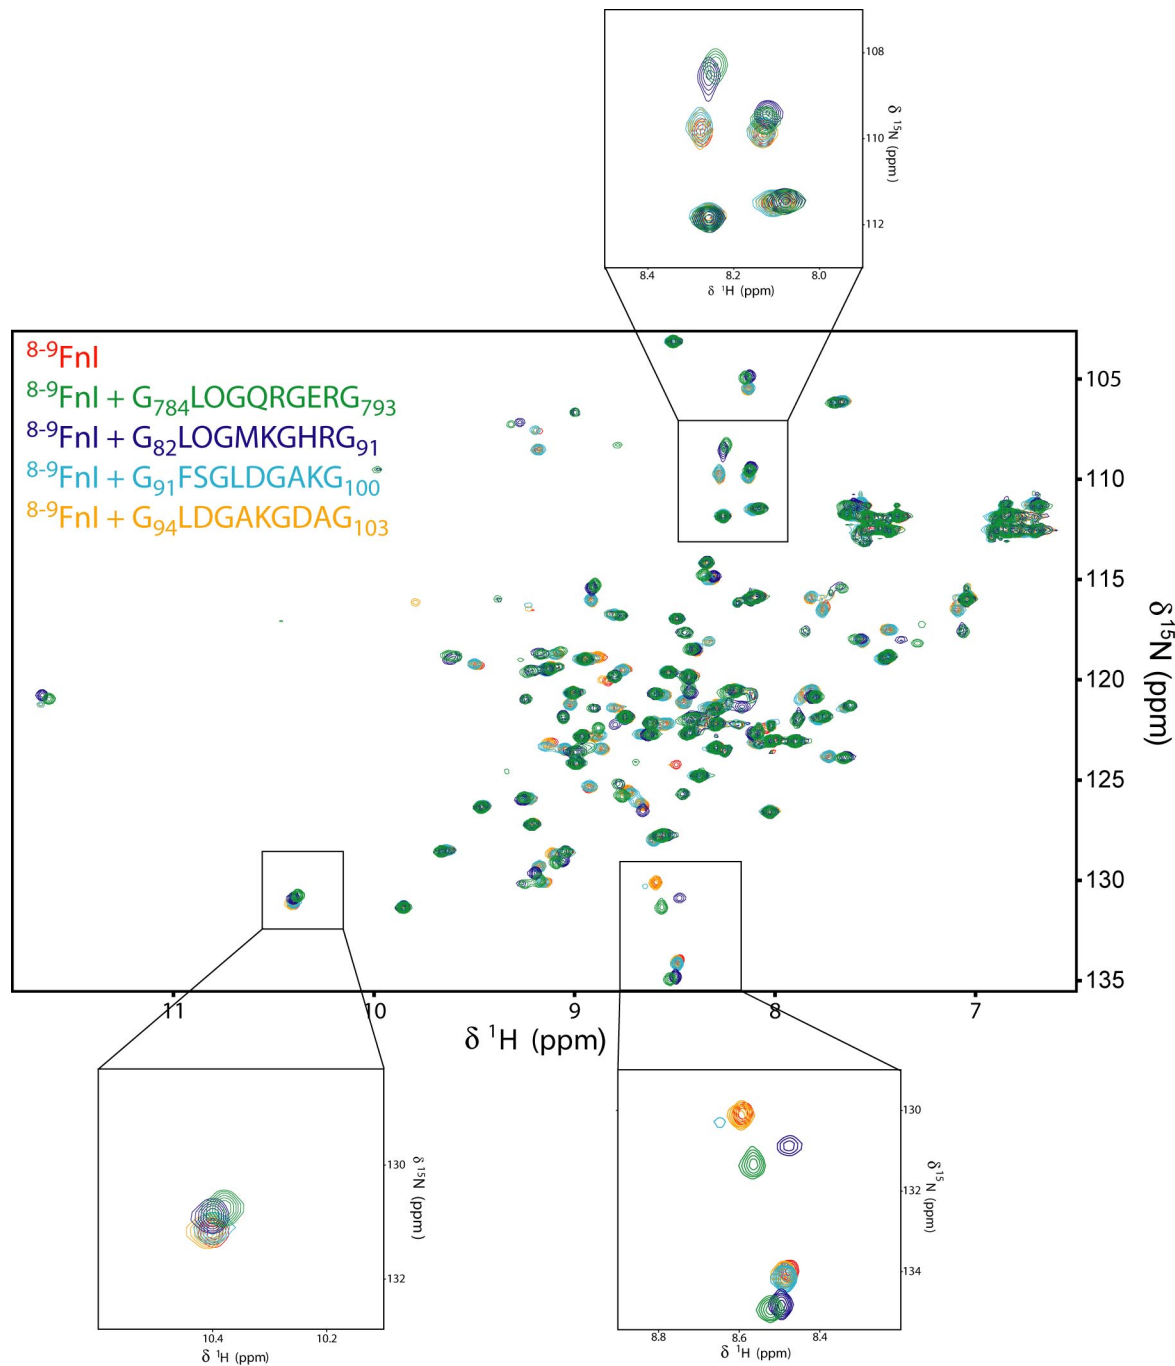

**Fig. S7.** NMR titrations of alternative  $\alpha_1(\text{I})$ -binding sites.  $^{15}\text{N}$ -HSQC spectra of  $^{8-9}\text{FnI}$  at 0.15 mM concentration in PBS, 25 °C (red) overlaid with spectra in complex with 0.6 mM peptide. Peptides used correspond to either the core binding sequence derived from the collagenase site of  $\alpha_1(\text{I})$ , GLPQRGERG(Y), or putative binding sites identified from the amino acid sequence. As seen, the degree of resonance perturbations varies indicating different binding affinities over these peptides.

**Table S1.  $K_d$ s of  $\alpha_1$ (I) peptides and Fn fragments**

| Sequence                                                           | $^{8-9}$ FnI                               | $^{6}$ FnI $^{1-2}$ FnII $^{7}$ FnI | GBD, $\mu$ M                  |
|--------------------------------------------------------------------|--------------------------------------------|-------------------------------------|-------------------------------|
| $\alpha_1$ (I) peptide sequence                                    |                                            |                                     | ND                            |
| GLGGNFAPQLSYGYDEKSTGGISVPGPM-Y                                     | – <sup>†</sup>                             | – <sup>§</sup>                      | ND                            |
| G <sub>763</sub> PAGAOGTOGPQGIAG <sub>G778</sub> -Y                | – <sup>†</sup>                             | <b>2.8 ± 0.2 mM<sup>§</sup></b>     | ND                            |
| G <sub>778</sub> QRGVVGLOGQRGERGFOGLOG <sub>G799</sub> -Y          | <b>5 ± 1 <math>\mu</math>M<sup>†</sup></b> | <b>57 ± 6 <math>\mu</math>M</b>     | ND                            |
| G <sub>796</sub> LOGPSGEOGKQGPSGASGER <sub>G816</sub> -Y           | <b>1.4 ± 0.12 mM<sup>†</sup></b>           | – <sup>§,¶</sup>                    | ND                            |
| G <sub>784</sub> LOGQRGERG <sub>G793</sub> -Y                      | <b>0.4 ± 0.03 mM<sup>†</sup></b>           | ND                                  | ND                            |
| G <sub>784</sub> FOGQRGERG <sub>G793</sub> -Y                      | <b>0.9 ± 0.10 mM<sup>†</sup></b>           | ND                                  | ND                            |
| G <sub>784</sub> LOGQRGEKG <sub>G793</sub> -Y                      | <b>1.1 ± 0.17 mM<sup>†</sup></b>           | ND                                  | ND                            |
| G <sub>784</sub> FOGQRGEKG <sub>G793</sub> -Y                      | – <sup>†¶</sup>                            | ND                                  | ND                            |
| G <sub>82</sub> LOGMKGHRG <sub>G91</sub> -Y                        | <b>0.4 ± 0.40 mM<sup>†</sup></b>           | ND                                  | ND                            |
| G <sub>91</sub> FSGLDGAKG <sub>G100</sub> -Y                       | – <sup>†¶</sup>                            | ND                                  | ND                            |
| G <sub>94</sub> LDGAKGDAG <sub>G103</sub> -Y                       | – <sup>†¶</sup>                            | ND                                  | ND                            |
| *-Q <sub>774</sub> GIAGQRGVVGLOGQRGERGFOGLO <sub>G798</sub>        | <b>4.2 ± 0.8 <math>\mu</math>M</b>         | ND                                  | <b>4.9 ± 0.6</b>              |
| *-A <sub>767</sub> OGTOGPQGIAGQRGVVGLOGQRGERGFOGLO <sub>G798</sub> | <b>5.3 ± 0.7 <math>\mu</math>M</b>         | ND                                  | <b>4.0 ± 2.5<sup>  </sup></b> |
| *-Q <sub>774</sub> GIAGQRGVVGLOGQRGER <sub>G792</sub>              | <b>7.3 ± 0.7 <math>\mu</math>M</b>         | ND                                  | ND                            |
| $\alpha_2$ (I) peptide sequence                                    |                                            |                                     |                               |
| G <sub>788</sub> AOGILGLOGSRGERGLOGVAG <sub>G799</sub> -Y          | <b>8 ± 2 <math>\mu</math>M<sup>†</sup></b> | <b>3 ± 0.8 mM<sup>§</sup></b>       | ND                            |

\* denotes N-terminal 5-carboxyfluorescein-labeled peptides, affinities for which were determined by fluorescence polarization in 150 mM NaCl, 20 mM Tris-Cl buffer (pH 7.4) (TBS) at 25 °C. Residues involved in amino acid substitutions compared with the wild-type G<sub>784</sub>–G<sub>793</sub> sequence are shown in bold type. ND, not determined.

<sup>†</sup>Affinities for unlabeled peptides were determined by NMR in PBS buffer at 25 °C.

<sup>‡</sup>Affinities for unlabeled peptides were determined by NMR in PBS buffer at 37 °C.

<sup>§</sup>Affinities for unlabeled peptides were determined by NMR in 20 mM sodium phosphate (pH 7.2) at 37 °C.

<sup>¶</sup>Very small resonance perturbations were observed; however, they are insufficient to accurately determine affinity.

<sup>||</sup>Two binding events are evident for  $\alpha_1$ (I) peptide 767–798 and GBD; shown is the value of the strongest binding.



**Table S2. Crystallographic dataset statistics and model refinement**

|                                                                              |                                                     |
|------------------------------------------------------------------------------|-----------------------------------------------------|
| Data collection                                                              |                                                     |
| Cell parameters                                                              | $a = b = 56.84 \text{ \AA}, c = 150.22 \text{ \AA}$ |
|                                                                              | $\alpha = \beta = 90^\circ, \gamma = 120^\circ$     |
| Wavelength, $\text{\AA}$                                                     | 0.9796                                              |
| Resolution, $\text{\AA}$                                                     | 50.06–2.00 (2.10–2.00)                              |
| Unique reflections                                                           | 19,940                                              |
| $R_{\text{merge}}$                                                           | 0.065 (0.571)                                       |
| Completeness, %                                                              | 100.0 (100.0)                                       |
| Multiplicity                                                                 | 6.9 (7.1)                                           |
| $I/\sigma(I)$                                                                | 18.1 (3.1)                                          |
| Refinement statistics                                                        |                                                     |
| Resolution, $\text{\AA}$                                                     | 49.23–2.10                                          |
| Unique reflections                                                           | 17126                                               |
| Working set                                                                  | 15,897 (92.8%)                                      |
| Free set                                                                     | 1,229 (7.2%)                                        |
| $R_{\text{work}}$                                                            | 0.2090                                              |
| $R_{\text{free}}$                                                            | 0.2424                                              |
| Overall mean $B$ values, $\text{\AA}^2$                                      | 52.4                                                |
| No. of amino acid residues per asymmetric unit (protein and ligand)          | 224                                                 |
| No of water molecules                                                        | 105                                                 |
| Matthews coefficient                                                         | 2.63 (water content, 53.34%)                        |
| RMSD from ideal values                                                       |                                                     |
| Bonds, $\text{\AA}/\text{angles}, ^\circ$                                    | 0.008/1.297                                         |
| Estimated overall coordinate error based on maximum likelihood, $\text{\AA}$ | 0.33                                                |
| Estimated phase error based on maximum likelihood, $^\circ$                  | 24.18                                               |
| Ramachandran plot statistics                                                 |                                                     |
| Residues in favored regions, %                                               | 94.5                                                |
| Residues in allowed regions, %                                               | 5.5                                                 |
| Residues in disallowed regions, %                                            | 0.0                                                 |

**Table S3. Putative <sup>8-9</sup>Fnl binding sites on  $\alpha_1$  and  $\alpha_2$  chains of type-I collagen**

| $\alpha_1$ chain residues       | Sequence    |
|---------------------------------|-------------|
| (UniProt-KB/Swiss-Prot: P02452) |             |
| 82-90*                          | GLP GMK GHR |
| 91-99                           | GFS GLD GAK |
| 94-102                          | GLD GAK GDA |
| 166-174                         | GFP GAV GAK |
| 316-324                         | GFP GAD GVA |
| 355-363                         | GLP GAK GLT |
| 502-510                         | GFP GER GVQ |
| 697-705                         | GFP GAA GRV |
| 775-783                         | GIA GQR GVV |
| 784-792*                        | GLP GQR GER |
| 928-936                         | GIK GHR GFS |
| $\alpha_2$ chain residues       |             |
| (UniProt-KB/Swiss-Prot: P02452) |             |
| 82-90*                          | GLP GFK GIR |
| 85-93                           | GFK GIR GHN |
| 88-96                           | GIR GHN GLD |
| 127-135                         | GLP GER GRV |
| 214-222                         | GLT GAK GAA |
| 316-324                         | GLP GAD GRA |
| 448-456                         | GVQ GGK GEQ |
| 535-543                         | GVV GAV GTA |
| 550-558                         | GLP GER GAA |
| 559-567                         | GIP GGK GEK |
| 697-705                         | GFP GAA GRT |
| 784-792*                        | GLP GSR GER |
| 793-801                         | GLP GVA GAV |
| 928-936                         | GLP GLK GHN |
| 931-939                         | GLK GHN GLQ |
| 940-948                         | GLP GIA GHH |
| 943-951                         | GIA GHH GDQ |

Asterisks denote predicted high-affinity sites for <sup>8-9</sup>Fnl.
